# Supplementary material
Source: publisher site journal article supplement (https://www.dovepress.com/get_supplementary_file.php?f=459166.docx)
Supplement: Supplementary file 1 [file get_supplementary_file.php]

**Supplementary material**

**Protective effect of the total alkaloid extract from Bulbus *Fritillariae Pallidiflorae* in a mouse model of cigarette smoke-induced chronic obstructive pulmonary disease**

Xiaoyu Wang1, Er-Bu AGA2, Wai Ming Tse3, Kathy Wai Gaun Tse3, and Bengui Ye *1,2

1 Key Laboratory of Drug-Targeting and Drug Delivery System of the Education Ministry, Sichuan Engineering Laboratory for Plant-Sourced Drug and Sichuan Research Center for Drug Precision Industrial Technology, West China School of Pharmacy, Sichuan University, Chengdu 610041, Sichuan, China

2 Medical College of Tibet University, Lasa 850002, Tibet, China

3 Nin Jiom Medicine Manufactory (H.K.) Limited, Hong Kong 999077, China

**Correspondence**: Bengui Ye, West China School of Pharmacy, Sichuan University, Chengdu, 610041, P.R. China, Fax: 86-28-85503950, Email: [benguiye513@163.com](mailto:benguiye513@163.com)

# Material and methods

***Preparation of BFP-TA and determination of total alkaloid content***

The appropriate amount of BFP was pulverized into powder (over 24 mesh sieve), then reflux extraction with 70% ethanol at a material-liquid ratio of 1:10 for two times, the first time for 4 hours and the second time for 3 hours. After filtering the dregs, the filtrate was combined and concentrated under reduced pressure to obtain the dry extract. The dry extract was dissolved in 2% HCl, then filtered again and adjusted to pH = 8 with NaOH solution, and the filtrate was used as an adsorbent. The prepared adsorbent was loaded on the H103 macroporous adsorbent resin and eluted with water and 30% ethanol sequentially until the eluate was negative for the molish reaction, then eluted with 90% ethanol and anhydrous ethanol until the eluate was negative for alkaloid reaction. The 90% ethanol and anhydrous ethanol eluent were collected and concentrated to dryness under reduced pressure to obtain the BFP-TA.

The content of total alkaloids was calculated with the method of "content determination" in the “*Fritillariae Cirrhosae* Bulbus” according to the Chinese Pharmacopoeia (2020 Edition). The content of total alkaloids was determined by UV-Vis spectrophotometry (Beijing Purkinje General Instrument Co., Beijing, China), using imperialine as the standard. The absorbance was measured at 415 nm, and the total alkaloid content was calculated using a calibration equation according to the standard curve obtained from imperialine.

***HPLC-ELSD and UHPLC-MS/MS analysis of BFP-TA***

HPLC-ELSD method: After the BFP-TA sample was dissolved in chromatographic methanol to 20 mg/mL, the solution was filtered through a 0.22 μm filter (Agilent, CA, USA) into an HPLC vial. The chromatographic separation was achieved on an Eclipse Plus C18 (250 mm × 4.6 mm, 5 μm), with a temperature stated at 25 °C. Analysis was completed with a gradient elution of 0.03% diethylamine (A) and acetonitrile (B), and the gradient program was as follows: 0–10 min, 30% B; 10–35 min, 30%→60% B; 35-45min, 60% B; 45-65min, 60%→90% B; 65-75min, 90% B; 75-80min, 90%→30% B; 80-90min, 30% B. The flow rate was 1.0 mL/min. The injection volume was 10 μL, using the SEDERE SEDEX 90 evaporative light scattering detector (Dikma, Beijing, China) with a gasification temperature of 40°C and air pressure of 3.5 bar**.**

UHPLC-MS/MS method: The chromatographic separation was achieved on an Agilent ZORBAX SB-C18 (100 mm × 2.1 mm, 1.8 μm), temperature stated at 40 °C. The analysis was completed with a gradient elution of 0.1% formic acid in purified water (A) and acetonitrile (B), and the gradient program was as follows: 0.0-0.5 min, 15%→15% B; 0.5-3.5 min, 15%→45% B; 3.5-4.5 min, 45%→50% B; 4.5-6.0 min, 50%→95% B; 6.0-8.0 min, 95%→95% B; 8.0-8.1 min, 95%→15% B; 8.1-11.0 min, 15%→15% B; 11.0 min, stop. The flow rate was 0.3 mL/min, and the injection volume was 1 μL.

The UHPLC system was coupled to the QQQ-MS/MS instrument (Shimadzu, Kyoto, Japan), operating in positive electrospray ionization (ESI) mode. The parameters for MS detection were as follows: the injection voltage was 5500 V, and the ion source temperature was 450 °C. The atomized gas (Gas1) was 50.0 psi, the heated gas (Gas2) was 50.0 psi, and the curtain gas (CUR) was 35.0 psi. Multiple reaction monitoring (MRM) was used for scanning; the collision gas (CAD) pressure was 9.0, and the Q1 and Q3 resolutions were UNIT. Data acquisition and processing were performed using Analyst Software 1.7.0 and SCIEX OS 1.6.1 software. For the qualitative and quantitative analysis of BFP-TA, nine isosteroid alkaloids were used as standards, namely edpetiline, imperialine, peimisine, yibeinoside A, verticinone, delavine, isopeimine, delavinone, and ebeiedinone. Subsequently, the content of the nine isosteroid alkaloids in BFP-TA was calculated using the calibration equation according to the standard curve obtained from the standards.
